# Supplementary material
Source: Research Square preprint supplement (doi:10.21203/rs.3.rs-9518180/v1)
Supplement: Supplementary file 1 [file 0b8d6907313421f4ae35a770.pdf]

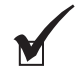

| Topic                               | Item       | Checklist item description                                                                                      | Reported on Line                                                    |
|-------------------------------------|------------|-----------------------------------------------------------------------------------------------------------------|---------------------------------------------------------------------|
| <b>Title</b>                        | <b>1</b>   | The diagnosis or intervention of primary focus followed by the words “case report” .....                        | Page1 line 1-2                                                      |
| <b>Key Words</b>                    | <b>2</b>   | 2 to 5 key words that identify diagnoses or interventions in this case report, including "case report" .....    | Page2 line 26-27                                                    |
| <b>Abstract<br/>(no references)</b> | <b>3a</b>  | Introduction: What is unique about this case and what does it add to the scientific literature?.....            | Page1 line 21-23                                                    |
|                                     | <b>3b</b>  | Main symptoms and/or important clinical findings .....                                                          | Page1 line 14-15, 17-19                                             |
|                                     | <b>3c</b>  | The main diagnoses, therapeutic interventions, and outcomes.....                                                | Page1 line 15-17, 19-21                                             |
|                                     | <b>3d</b>  | Conclusion—What is the main “take-away” lesson(s) from this case? .....                                         | Page1 line 23-25                                                    |
| <b>Introduction</b>                 | <b>4</b>   | One or two paragraphs summarizing why this case is unique (may include references).....                         | Page2-3, line 29-63                                                 |
| <b>Patient Information</b>          | <b>5a</b>  | De-identified patient specific information.....                                                                 | Page4 line 71                                                       |
|                                     | <b>5b</b>  | Primary concerns and symptoms of the patient.....                                                               | Page4 line 71-73                                                    |
|                                     | <b>5c</b>  | Medical, family, and psycho-social history including relevant genetic information.....                          | N/A                                                                 |
|                                     | <b>5d</b>  | Relevant past interventions with outcomes .....                                                                 | Page4 line 73-76                                                    |
| <b>Clinical Findings</b>            | <b>6</b>   | Describe significant physical examination (PE) and important clinical findings .....                            | Page4 line 76-79                                                    |
| <b>Timeline</b>                     | <b>7</b>   | Historical and current information from this episode of care organized as a timeline .....                      | Page4 line 86, line93                                               |
| <b>Diagnostic Assessment</b>        |            |                                                                                                                 | page 7 line 107, line 116                                           |
|                                     | <b>8a</b>  | Diagnostic testing (such as PE, laboratory testing, imaging, surveys). .....                                    | Page4-9, line 76-132                                                |
|                                     | <b>8b</b>  | Diagnostic challenges (such as access to testing, financial, or cultural).....                                  | Page8, line122-125                                                  |
| <b>Therapeutic Intervention</b>     | <b>8c</b>  | Diagnosis (including other diagnoses considered) .....                                                          | Page8-9, line 122-132                                               |
|                                     | <b>8d</b>  | Prognosis (such as staging in oncology) where applicable.....                                                   | N/A                                                                 |
|                                     | <b>9a</b>  | Types of therapeutic intervention (such as pharmacologic, surgical, preventive, self-care) .....                | Page9, line 133-137                                                 |
| <b>Follow-up and Outcomes</b>       | <b>9b</b>  | Administration of therapeutic intervention (such as dosage, strength, duration).....                            | Page9, line 133-137                                                 |
|                                     | <b>9c</b>  | Changes in therapeutic intervention (with rationale).....                                                       | N/A                                                                 |
|                                     | <b>10a</b> | Clinician and patient-assessed outcomes (if available).....                                                     | Page9, line 137-141                                                 |
|                                     | <b>10b</b> | Important follow-up diagnostic and other test results .....                                                     | N/A                                                                 |
|                                     | <b>10c</b> | Intervention adherence and tolerability (How was this assessed?).....                                           | Page9, line 143-146                                                 |
| <b>Discussion</b>                   | <b>10d</b> | Adverse and unanticipated events.....                                                                           | N/A                                                                 |
|                                     | <b>11a</b> | A scientific discussion of the strengths AND limitations associated with this case report.....                  | Page9-10, line 148-159                                              |
|                                     | <b>11b</b> | Discussion of the relevant medical literature with references .....                                             | Page10-14, line 159-202                                             |
|                                     | <b>11c</b> | The scientific rationale for any conclusions (including assessment of possible causes).....                     | Page10,line 161-163, page13-14, line 192-200                        |
|                                     | <b>11d</b> | The primary “take-away” lessons of this case report (without references) in a one paragraph conclusion .....    | Page14,line 209-213,<br>Page15 ,line 218-221                        |
| <b>Patient Perspective</b>          | <b>12</b>  | The patient should share their perspective in one to two paragraphs on the treatment(s) they received . . . . . | N/A                                                                 |
| <b>Informed Consent</b>             | <b>13</b>  | Did the patient give informed consent? Please provide if requested .....                                        | Yes <input checked="" type="checkbox"/> No <input type="checkbox"/> |
